# Supplementary material
Source: publisher site journal article supplement (https://www.dovepress.com/get_supplementary_file.php?f=177206-2.xlsx)
Supplement: Supplementary file 1 [file get_supplementary_file.php]

## Sheet: Sheet1
Table S2: AS1 Atomic Distances (Å) for All EPO Variants
Ligand Residue	Interaction	EPO-WT	R150Q	R150E	Literature Value*		SEM (WT)	SEM (R150Q)	SEM (R150E)
Lys 20	Nζ - Glu 202 Oε1	5.50667	4.8	7.63667	3.5		0.900451	0.742989	0.169542
Arg 150	O - Ser 204 Oγ	2.58667	2.63333	2.69333	2.6		0.0233333	0.0866025	0.0218581
	Nɳ1/Nε2 - Pro 203 O	2.79667	2.77		2.8		0.069602	0.0260342
	Nɳ1 - Glu 117 Oε2	3.22333			3.2		0.239537
	Nɳ2 - Glu 117 Oε2	2.79667			2.8		0.00881917
Asn 147	Nδ2 - Phe 93 O	3.92667	4.6	4.94667	3.1		0.506963	0.113725	0.115518
	Nδ2 - His 114 Nε2	2.96333	3.22	3.56333	3		0.0693622	0.120554	0.031798
	Oδ1 - His 114 Nε2	3.53667	2.73	2.93333	3.5		0.103333	0.0608276	0.127192
Lys20	Nζ - Glu 117 Oε1	6.17333	5.82333	4.39667	0		0.260853	0.537907	0.108985
Thr44	Oγ - Phe 93 O	2.67333	2.58667	2.72333	2.6		0.0145297	0.00333333	0.0409607
Lys 45	Nζ - Glu 62 Oε1	4.59333	4.77333	5.21	3.1		0.44461	0.197428	0.0888819
Val46	N - Ser 92 O	2.93	2.96667	2.92333	3		0.0665833	0.0548736	0.00333333
	O - Ser 92 N	2.93667	2.83667	2.83667	2.8		0.0523874	0.0448454	0.0440959
Asn47	Nδ2 - Thr 87 O	3.05667	2.9	3.63	2.9		0.0120185	0.0404145	0.815046
	Nδ2 - Ala 88 O	5.06333	5.17	3.87333	3.2		0.216744	0.225019	0.462685
Arg 131	Nɳ2 - Asp 61 O	3.87	3.79	2.74667	2.8		0.385919	0.161658	0.0635959
Lys 140	Nζ -Asp 61 Oδ2	2.72333	2.73	2.79667	3		0.0417665	0.0264575	0.0352767
Arg 143	Nɳ2 - Glu 60 Oε2	2.77	2.68333	2.77667	2.8		0.06	0.0185592	0.0635959
	*Data from Syed et al [9].
